# Supplementary material
Source: HighWire-hosted journal article supplement (http://heart.bmjjournals.com/highwire/filestream/125083/field_highwire_adjunct_files/0/64600_efigs.pdf)
Supplement: 64600_efigs.pdf [file 64600_efigs.pdf]

# LF/HF ratio

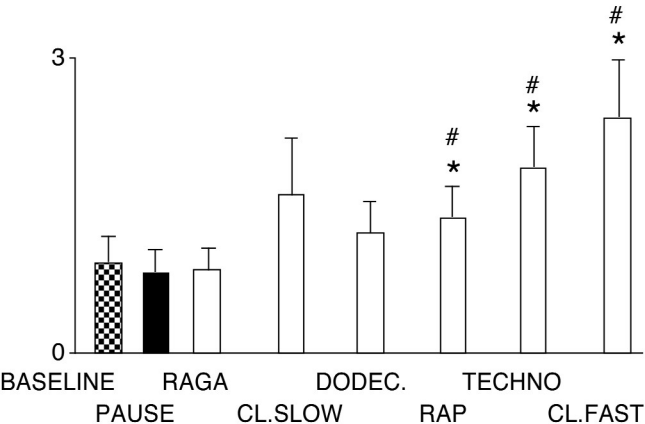

## Supplemental figure 1

Responses in LF/HF ratio of spectral analysis of heart rate variability for each intervention (CL: classical, DODEC: dodecaponic). \*:  $p < 0.05$ , vs Baseline; #:  $p < 0.05$  vs Pause.

LF/HF ratio

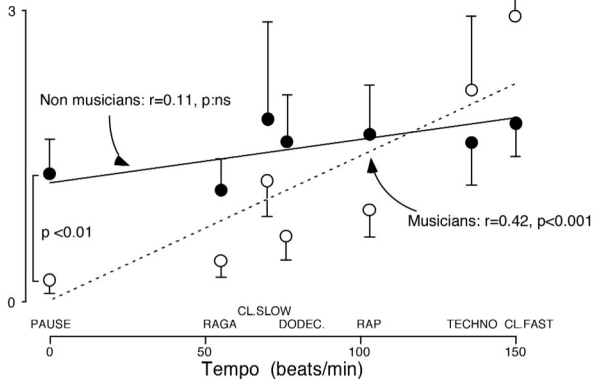

## Supplemental figure 2

Relationship between music tempo and LF/HF ratio (open circles with standard error and dotted regression line) and non-musicians (solid circles with standard error and solid line). Abbreviations as in Figure 1. Musicians show larger responses to tempo.
